# Supplementary material for: Contribution Evaluation of Physical Hole Structure, Hydrogen Bond, and Electrostatic Attraction on Dye Adsorption through Individual Experiments
Source: Hindawi journal article supplement (doi:10.1155/2023/4596086), 2023-01-01
Supplement: f1 [file 4596086.f1.doc]

**Graphical Abstract**
